# Supplementary material for: Few-layered ultra-small MoS2 nanosheet cathode for high-performance rechargeable aluminum-ion battery
Source: Royal Society of Chemistry journal article supplement (doi:10.1039/d1se00959a), 2021-01-01
Supplement: d1se00959a1.pdf [file d1se00959a1.pdf]

*Supporting information*

**Few-layered ultrasmall MoS<sub>2</sub> nanosheets cathode  
material for high performance rechargeable  
aluminum-ion battery**

Qiang Zhang, Qianfeng Liu and Erdong Wang\*

Division of Fuel Cell & Battery, Dalian National Laboratory for Clean Energy, Dalian Institute of Chemical Physics,

Chinese Academy of Sciences, Dalian 116023, China.

\*Corresponding author Erdong Wang E-mail: edwang@dicp.ac.cn.

## Experiment Section

### Preparation of the samples

The M-MoS<sub>2</sub> was prepared through microwave-assisted precursor synthesis method combined with subsequent calcination. Typically, 30 mL of PEG-400 was added into a 300 mL three-necked flask, and then 0.5004 g Sodium molybdate dehydrate and 0.6200 g Thiourea were added with vigorous stirring for 10 min. Afterwards, the mixed solution were transferred to a multipurpose microwave chemical synthesizer X-8000, following with microwave irradiation 800 W for 6 min under 185°C with vigorous stirring. After natural cooling, the product was washed thoroughly with ethanol and water several times via centrifugation. Then, the resultant product was subjected to drying at 60 °C for 6 h. Finally, the M-MoS<sub>2</sub> was obtained after calcination at 800 °C for 2 h under argon atmosphere. For comparison, the H-MoS<sub>2</sub> and S-MoS<sub>2</sub> samples were also synthesized by hydrothermal method and solvothermal method at 185 °C for 20 h using deionized water and PEG-400 as solvent, respectively.

### Characterization

The crystal characteristics of the M-MoS<sub>2</sub>, H-MoS<sub>2</sub> and S-MoS<sub>2</sub> samples were characterized using X-ray diffraction (XRD) on an X-ray 6000 diffractometer with the 2θ angle region from 10° to 70° at a scan rate of 6° min<sup>-1</sup>. The morphological features of the samples were determined by scanning electronic microscopy (SEM), transmission electron microscopy (TEM) and high-resolution TEM (HR-TEM) which were carried out using JSM-7500F (5 kV) and

JEM-2100F (JEOL, 200 kV) instruments. N<sub>2</sub> adsorption–desorption isotherms were obtained using a NOVA 2200e system. X-ray photoelectron spectrometer (XPS) analyses were performed using an ESCALAB 250 instrument.

#### Electrochemical testing

2032-type coin cells were assembled in an argon filled glovebox to estimate the electrochemical performances of the M-MoS<sub>2</sub>, H-MoS<sub>2</sub> and S-MoS<sub>2</sub> samples. The active material, acetylene black and poly(vinylidene fluoride) (PVDF) were added into the N-methylpyrrolidone (NMP) solvent dispersant with a weight ratio of 8:1:1 to prepare cathode slurries. The positive electrodes were prepared by coating the slurries onto Ta foil (1.5cm<sup>2</sup>) and dried at 60 °C for 12 h in a vacuum. The Al metal (30µm) was used as the counter electrode and the Whatman glass fiber (GF/C) was used as the separator to assemble the cells. A room-temperature ionic liquid electrolyte was made by mixing anhydrous aluminum chloride (AlCl<sub>3</sub>) and 1-ethyl-3-methylimidazolium chloride ([EMIm]Cl) at a molar ratio of 1.3:1 in a glove box filled with high purity argon gas. A LAND-CT2001A battery test system was used to test the charge–discharge curves in a voltage range of 0.01–2.0 V. The specific capacities at different current densities were calculated based on the mass of active materials (about 1.2 mg cm<sup>-2</sup>). Cyclic voltammetry (CV) curves were obtained in a voltage range of 0.01–2.0 V at a scan rate of 0.2 mV s<sup>-1</sup>. The electrochemical impedance spectra (EIS) were measured in the frequency range of 0.1 Hz–1 MHz with a 5

mV amplitude. The CV and EIS measurements were performed on a CHI660D electrochemical workstation.

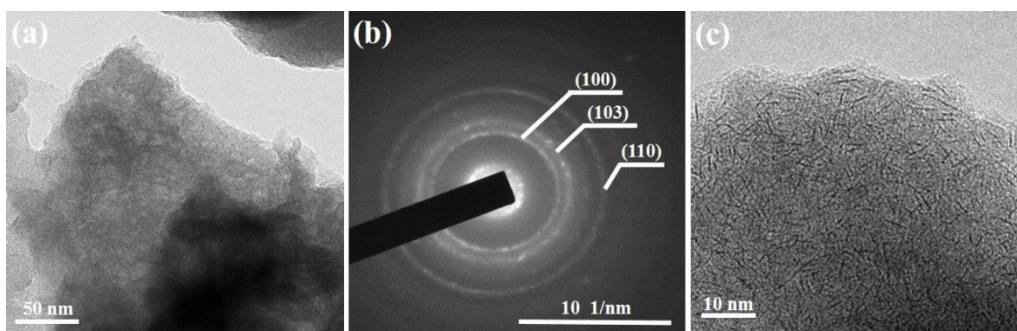

**Fig. S1** (a) The TEM, (b) SAED pattern and (c) HR-TEM image of M-MoS<sub>2</sub>.

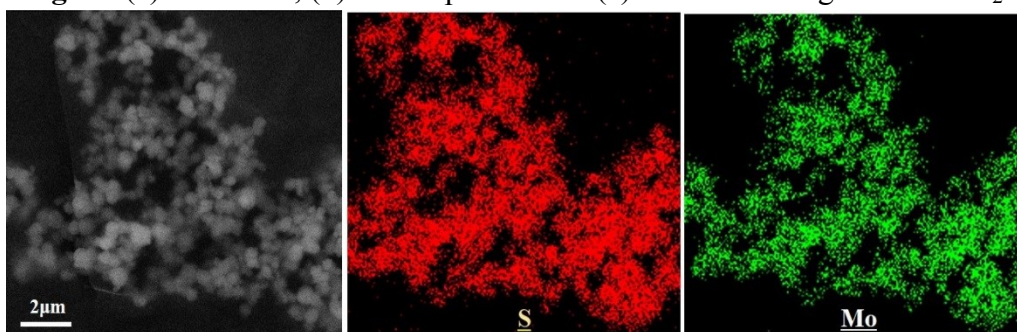

**Fig. S2** The SEM image and its related elemental mapping of S and Mo images of the M-MoS<sub>2</sub>.

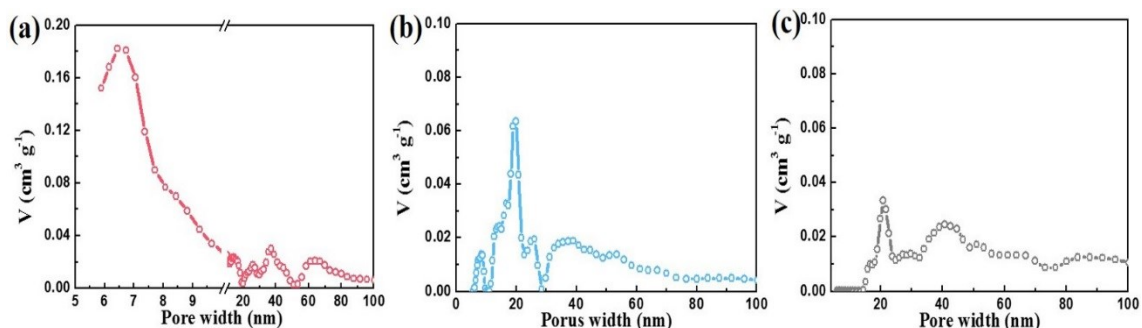

**Fig. S3** The pore size distribution of the (a) M-MoS<sub>2</sub>, (b) S-MoS<sub>2</sub> and (c) H-MoS<sub>2</sub>.

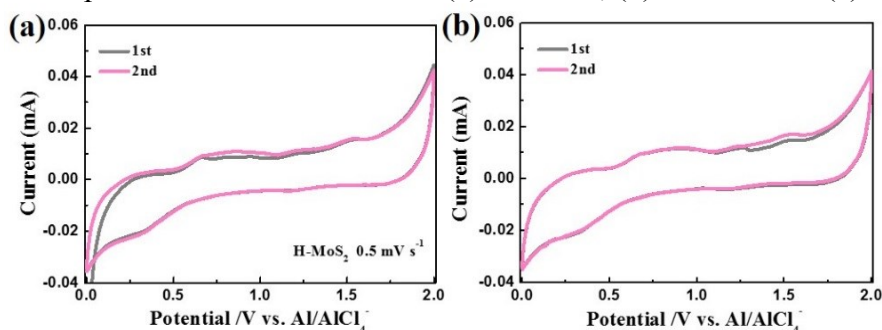

**Fig. S4** The CV curves at 0.5 mV s<sup>-1</sup> for the first two cycles of (a) S-MoS<sub>2</sub> and (b) H-MoS<sub>2</sub>.

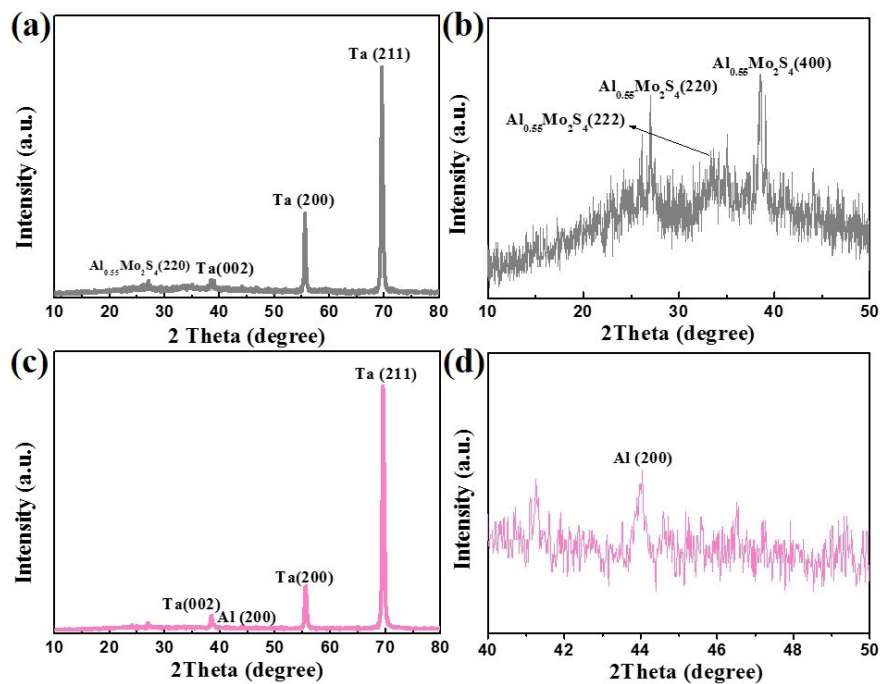

**Fig. S5** The XRD pattern of M-MoS<sub>2</sub> after discharge to 0.6V (a, b) and after charge to 1.15V (c, d).

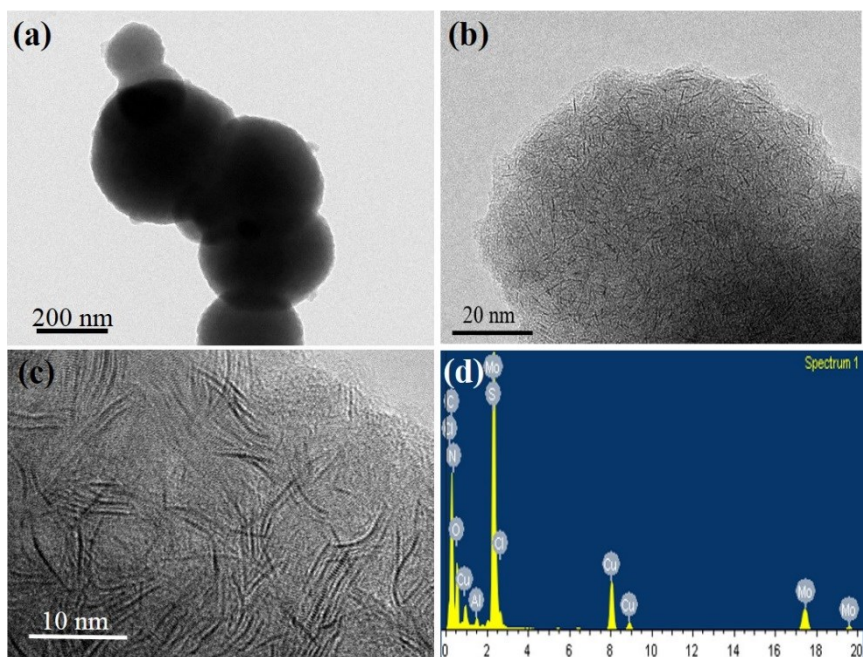

**Fig. S6** The TEM (a,b), HR-TEM (c) and EDS (d) images of M-MoS<sub>2</sub> after 100 cycles.

**Table 1** The comparison list of Sulfide-based cathode materials for AIBs.

| Sample                            | Specific capacity<br>(mAh g <sup>-1</sup> ) | Current<br>density<br>(mA g <sup>-1</sup> ) | Reference | Journal                                     |
|-----------------------------------|---------------------------------------------|---------------------------------------------|-----------|---------------------------------------------|
| G-SnS <sub>2</sub>                | <b>70</b> after 100 cycles                  | 200                                         | 14        | Adv. Mater.<br>(2017)                       |
| Ni <sub>3</sub> S <sub>2</sub> @G | <b>60</b> after 100 cycles                  | 100                                         | 22        | Adv. Energy<br>Mater.<br>(2016)             |
| CuS@C                             | <b>90</b> after 100 cycles                  | 20                                          | 23        | ACS Nano<br>(2017)                          |
| Co <sub>3</sub> S <sub>4</sub>    | <b>100</b> after 150<br>cycles              | 50                                          | 24        | Nano Energy<br>(2019)                       |
| MoS <sub>2</sub> @C               | <b>126.6</b> after 200<br>cycles            | 100                                         | 25        | ACS Sustainable<br>Chem. Eng.<br>(2019)     |
| Bulk MoS <sub>2</sub>             | <b>66.7</b> after 100<br>cycles             | 40                                          | 26        | ACS Appl.<br>Mater.<br>Interfaces<br>(2018) |
| <b>M-MoS<sub>2</sub></b>          | <b>73</b> after 150cycles                   | 100                                         | -         | Our Work                                    |
